# Supplementary material for: Impact of intrapartum oxytocin administration on neonatal sucking behavior and breastfeeding
Source: PubMed Central journal article supplement (PMC10928222; doi:10.1038/s41598-024-56635-9), 2024-03-11
Supplement: 41598_2024_56635_MOESM1_ESM.pdf [file 41598_2024_56635_MOESM1_ESM.pdf]

| Objective             | Indications                                  | n (%)    |
|-----------------------|----------------------------------------------|----------|
| Augmentation of labor | Delayed labor                                | 8 (100)  |
|                       | Overall                                      | 8 (100)  |
| Induction of labor    | Maternal gestational diabetes, diabetes      | 5 (23.8) |
|                       | Pre-labor rupture of membranes               | 4 (19.0) |
|                       | Maternal cardiac disease                     | 4 (19.0) |
|                       | Maternal hypertensive disorders of pregnancy | 2 (9.5)  |
|                       | Family preferences                           | 2 (9.5)  |
|                       | Past the expected date of delivery           | 1 (4.8)  |
|                       | Maternal kidney disease                      | 1 (4.8)  |
|                       | Maternal epilepsy                            | 1 (4.8)  |
|                       | Risk of rapid delivery progress              | 1 (4.8)  |
| Overall               | 21 (100)                                     |          |

**Supplementary Material 1:** Objectives and indications for oxytocin administration

| Major maternal complications        | YES                                 | NO                                  | <i>P</i> -value |
|-------------------------------------|-------------------------------------|-------------------------------------|-----------------|
|                                     | Exclusive breastfeeding<br>/others† | Exclusive breastfeeding<br>/others† |                 |
| Hypertensive disorders of pregnancy | 0 (0.0) / 3 (100.0)                 | 20 (32.8) / 41 (67.2)               | 0.318           |
| Gestational or maternal diabetes    | 4 (28.6) / 10 (71.4)                | 16 (32.0) / 34 (68.0)               | 0.542           |
| Threatened preterm labor            | 1 (33.3) / 2 (66.7)                 | 19 (31.1) / 42 (68.9)               | 0.682           |
| Cardiac disease                     | 1 (20.0) / 4 (80.0)                 | 19 (32.2) / 40 (67.8)               | 0.499           |
| Kidney disease                      | 1 (33.3) / 2 (66.7)                 | 19 (31.1) / 42 (68.9)               | 0.682           |
| Thyroid disease                     | 1 (25.0) / 3 (75.0)                 | 19 (31.7) / 41 (68.3)               | 0.631           |
| Epilepsy                            | 1 (50.0) / 1 (50.0)                 | 19 (30.6) / 43 (69.4)               | 0.531           |

**Supplementary Material 2.** Percentage of mothers exclusively breastfeeding at 1 month postpartum in the groups with and without complications.

†others mean mixed breastfeeding and formula and exclusive formula.

Data are numbers and percentages.

*P*-values were calculated using the chi-squared test.

| n=64                                   |           |         |           |         |         |
|----------------------------------------|-----------|---------|-----------|---------|---------|
| Hypertensive disorders<br>of pregnancy | Yes (n=3) |         | No (n=61) |         | p-value |
|                                        | Mean      | SD      | Mean      | SD      |         |
| Total cycles                           | 186.33    | (52.00) | 202.75    | (91.84) | 0.444   |
| <b>Total bursts</b>                    | 17.00     | (3.61)  | 16.64     | (6.07)  | 0.130   |
| Burst rate                             | 37.89     | (12.04) | 39.31     | (20.14) | 0.780   |
| Amplitude                              | -182.15   | (34.49) | -188.22   | (36.77) | 0.763   |
| CV%†                                   | -18.53    | (3.81)  | -19.43    | (7.13)  | 0.812   |
| Peak interval                          | 0.63      | (0.09)  | 0.63      | (0.08)  | 0.812   |
| CV%†                                   | 19.81     | (6.62)  | 19.40     | (3.27)  | 0.787   |
| <b>Pause time</b>                      | 18.02     | (8.61)  | 12.51     | (8.24)  | 0.109   |
| CV%†                                   | 149.64    | (39.89) | 87.22     | (52.47) | 0.055   |
| Burst duration                         | 6.91      | (2.35)  | 7.92      | (6.18)  | 0.886   |
| CV%†                                   | 83.13     | (38.18) | 69.22     | (27.11) | 0.418   |
| Cycles/burst                           | 11.67     | (2.36)  | 13.18     | (8.15)  | 0.911   |
| CV%†                                   | 71.95     | (43.99) | 60.03     | (25.50) | 0.515   |
| Frequency                              | 2.02      | (0.20)  | 1.99      | (0.37)  | 0.715   |
| CV%†                                   | 25.11     | (6.29)  | 18.30     | (10.10) | 0.131   |

**Supplementary Material 3.** Non-nutritive sucking characteristics in infants born to mothers with and without hypertensive disorders of pregnancy.

P-values were calculated using the Mann–Whitney U test.

†CV%=(SD/mean×100).

Abbreviations: SD, standard deviation; CV, coefficient of variation.

| n=64                             |            |         |           |         |         |
|----------------------------------|------------|---------|-----------|---------|---------|
| Gestational or maternal diabetes | Yes (n=14) |         | No (n=50) |         | p-value |
|                                  | Mean       | SD      | Mean      | SD      |         |
| Total cycles                     | 217.21     | (92.27) | 191.72    | (93.94) | 0.389   |
| <b>Total bursts</b>              | 17.07      | (4.80)  | 15.94     | (6.68)  | 0.505   |
| Burst rate                       | 40.53      | (18.23) | 37.69     | (20.96) | 0.570   |
| Amplitude                        | -193.14    | (39.12) | -186.47   | (35.92) | 0.733   |
| CV%†                             | -20.46     | (7.27)  | -19.09    | (6.96)  | 0.526   |
| Peak interval                    | 0.61       | (0.08)  | 0.63      | (0.08)  | 0.291   |
| CV%†                             | 19.06      | (2.92)  | 19.51     | (3.55)  | 0.649   |
| <b>Pause time</b>                | 11.18      | (6.17)  | 13.21     | (8.77)  | 0.372   |
| CV%†                             | 80.13      | (37.82) | 92.95     | (56.98) | 0.909   |
| Burst duration                   | 7.31       | (3.59)  | 8.03      | (6.59)  | 0.974   |
| CV%†                             | 66.33      | (19.36) | 70.86     | (29.44) | 0.845   |
| Cycles/burst                     | 12.77      | (5.11)  | 13.20     | (8.65)  | 0.685   |
| CV%†                             | 57.74      | (18.86) | 61.38     | (28.04) | 0.909   |
| Frequency                        | 2.01       | (0.34)  | 1.98      | (0.37)  | 0.697   |
| CV%†                             | 16.77      | (7.51)  | 19.14     | (10.63) | 0.559   |

**Supplementary Material 4.** Non-nutritive sucking characteristics in infants born to mothers with and without gestational or maternal diabetes.

P-values were calculated using the Mann–Whitney U test.

†CV%=(SD/mean×100).

Abbreviations: SD, standard deviation; CV, coefficient of variation.

| Threatened preterm labor | Yes (n=3) |         | No (n=61) |         | p-value |
|--------------------------|-----------|---------|-----------|---------|---------|
|                          | Mean      | SD      | Mean      | SD      |         |
| Total cycles             | 231.33    | (82.95) | 195.62    | (94.24) | 0.587   |
| <b>Total bursts</b>      | 20.67     | (4.04)  | 15.97     | (6.33)  | 0.143   |
| Burst rate               | 44.69     | (19.46) | 37.99     | (20.43) | 0.566   |
| Amplitude                | -188.80   | (25.13) | -187.89   | (37.04) | 0.929   |
| CV%†                     | -13.68    | (4.44)  | -19.67    | (7.00)  | 0.088   |
| Peak interval            | 0.63      | (0.06)  | 0.63      | (0.08)  | 0.788   |
| CV%†                     | 19.52     | (4.44)  | 19.41     | (3.39)  | 0.976   |
| <b>Pause time</b>        | 7.92      | (1.22)  | 13.00     | (8.40)  | 0.182   |
| CV%†                     | 69.36     | (52.68) | 91.17     | (53.63) | 0.587   |
| Burst duration           | 7.00      | (3.95)  | 7.91      | (6.15)  | 0.905   |
| CV%†                     | 50.21     | (4.25)  | 70.84     | (27.79) | 0.204   |
| Cycles/burst             | 11.91     | (5.66)  | 13.16     | (8.10)  | 0.881   |
| CV%†                     | 43.16     | (7.39)  | 61.45     | (26.53) | 0.193   |
| Frequency                | 1.87      | (0.27)  | 2.00      | (0.37)  | 0.674   |
| CV%†                     | 11.56     | (3.33)  | 18.97     | (10.13) | 0.161   |

**Supplementary Material 5.** Non-nutritive sucking characteristics in infants born to mothers with and without a history of threatened preterm labor.

P-values were calculated using the Mann–Whitney U test.

†CV%=(SD/mean×100).

Abbreviations: SD, standard deviation; CV, coefficient of variation.

| Cardiac diseases    | n=64      |         |           |         |         |
|---------------------|-----------|---------|-----------|---------|---------|
|                     | Yes (n=5) |         | No (n=59) |         | p-value |
|                     | Mean      | SD      | Mean      | SD      |         |
| Total cycles        | 228.80    | (54.98) | 194.63    | (95.84) | 0.416   |
| <b>Total bursts</b> | 17.20     | (5.93)  | 16.10     | (6.37)  | 0.539   |
| Burst rate          | 44.08     | (11.32) | 37.82     | (20.86) | 0.461   |
| Amplitude           | 179.92    | (36.64) | 188.61    | (36.64) | 0.608   |
| CV%†                | 21.22     | (8.23)  | 19.23     | (6.94)  | 0.644   |
| Peak interval       | 0.62      | (0.05)  | 0.63      | (0.08)  | 0.950   |
| CV%†                | 21.97     | (2.91)  | 19.20     | (3.37)  | 0.056   |
| <b>Pause time</b>   | 13.06     | (8.80)  | 12.74     | (8.31)  | 0.990   |
| <b>CV%†</b>         | 92.85     | (63.72) | 89.92     | (53.04) | 0.950   |
| Burst duration      | 8.31      | (3.03)  | 7.83      | (6.25)  | 0.445   |
| CV%†                | 76.02     | (29.21) | 69.35     | (27.53) | 0.557   |
| Cycles/burst        | 14.10     | (3.71)  | 13.02     | (8.25)  | 0.388   |
| CV%†                | 68.69     | (28.79) | 59.90     | (26.14) | 0.431   |
| Frequency           | 1.90      | (0.24)  | 2.00      | (0.37)  | 0.774   |
| CV%†                | 21.35     | (11.75) | 18.39     | (9.95)  | 0.476   |

**Supplementary Material 6.** Non-nutritive sucking characteristics in infants born to mothers with and without cardiac diseases.

P-values were calculated using the Mann–Whitney U test.

†CV%=(SD/mean×100).

Abbreviations: SD, standard deviation; CV, coefficient of variation.

| Kidney diseases     | n=64      |         |           |         |         |
|---------------------|-----------|---------|-----------|---------|---------|
|                     | Yes (n=3) |         | No (n=61) |         | p-value |
|                     | Mean      | SD      | Mean      | SD      |         |
| Total cycles        | 184.33    | (64.29) | 197.93    | (94.99) | 0.788   |
| <b>Total bursts</b> | 12.33     | (1.53)  | 16.38     | (6.39)  | 0.204   |
| Burst rate          | 40.74     | (10.47) | 38.19     | (20.70) | 0.858   |
| Amplitude           | -214.82   | (21.52) | -186.61   | (36.61) | 0.143   |
| CV%†                | -15.59    | (1.86)  | -19.57    | (7.10)  | 0.446   |
| Peak interval       | 0.74      | (0.12)  | 0.62      | (0.08)  | 0.059   |
| CV%†                | 16.03     | (0.62)  | 19.58     | (3.40)  | 0.046*  |
| <b>Pause time</b>   | 15.13     | (4.52)  | 12.65     | (8.42)  | 0.182   |
| CV%†                | 73.72     | (45.94) | 90.96     | (53.91) | 0.719   |
| Burst duration      | 9.86      | (2.10)  | 7.77      | (6.17)  | 0.182   |
| CV%†                | 67.76     | (34.39) | 69.97     | (27.45) | 0.858   |
| Cycles/burst        | 14.76     | (4.00)  | 13.02     | (8.13)  | 0.341   |
| CV%†                | 59.99     | (32.56) | 60.62     | (26.20) | 0.976   |
| Frequency           | 1.78      | (0.56)  | 2.00      | (0.35)  | 0.295   |
| CV%†                | 27.32     | (25.29) | 18.19     | (8.96)  | 0.834   |

**Supplementary Material 7.** Non-nutritive sucking characteristics in infants born to mothers with and without kidney diseases.

P-values were calculated using the Mann–Whitney U test. \* $p < 0.05$

†CV%=(SD/mean×100).

Abbreviations: SD, standard deviation; CV, coefficient of variation.

| Thyroid diseases    | Yes (n=4) |         | No (n=60) |         | <i>p</i> -value |
|---------------------|-----------|---------|-----------|---------|-----------------|
|                     | Mean      | SD      | Mean      | SD      |                 |
| Total cycles        | 161.00    | (52.45) | 199.72    | (95.35) | 0.397           |
| <b>Total bursts</b> | 16.25     | (3.40)  | 16.18     | (6.47)  | 0.989           |
| Burst rate          | 31.44     | (15.32) | 38.77     | (20.60) | 0.565           |
| Amplitude           | -204.68   | (14.06) | -186.82   | (37.24) | 0.298           |
| CV%†                | -19.84    | (5.69)  | -19.35    | (7.11)  | 0.698           |
| Peak interval       | 0.63      | (0.08)  | 0.63      | (0.08)  | 0.758           |
| CV%†                | 21.07     | (1.39)  | 19.31     | (3.47)  | 0.120           |
| <b>Pause time</b>   | 11.99     | (1.38)  | 12.82     | (8.54)  | 0.444           |
| <b>CV%†</b>         | 117.79    | (43.08) | 88.31     | (53.78) | 0.227           |
| Burst duration      | 5.96      | (4.09)  | 8.00      | (6.16)  | 0.428           |
| CV%†                | 104.35    | (46.81) | 67.57     | (24.68) | 0.100           |
| Cycles/burst        | 9.95      | (4.89)  | 13.32     | (8.12)  | 0.367           |
| CV%†                | 88.25     | (38.08) | 58.74     | (24.59) | 0.100           |
| Frequency           | 2.03      | (0.42)  | 1.99      | (0.36)  | 0.799           |
| CV%†                | 17.59     | (3.00)  | 18.69     | (10.34) | 0.904           |

**Supplementary Material 8.** Non-nutritive sucking characteristics in infants born to mothers with and without thyroid diseases.

*P*-values were calculated using the Mann–Whitney U test.

†CV%=(SD/mean×100).

Abbreviations: SD, standard deviation; CV, coefficient of variation.

| Epilepsy            | n=64      |         |           |         |         |
|---------------------|-----------|---------|-----------|---------|---------|
|                     | Yes (n=2) |         | No (n=62) |         | p-value |
|                     | Mean      | SD      | Mean      | SD      |         |
| Total cycles        | 100.00    | (53.74) | 200.44    | (93.02) | 0.168   |
| <b>Total bursts</b> | 13.50     | (6.36)  | 16.27     | (6.33)  | 0.595   |
| Burst rate          | 15.31     | (7.88)  | 39.05     | (20.16) | 0.089   |
| Amplitude           | -167.77   | (15.83) | -188.58   | (36.78) | 0.339   |
| CV%†                | -29.46    | (0.78)  | -19.06    | (6.86)  | 0.036*  |
| Peak interval       | 0.54      | (0.02)  | 0.63      | (0.08)  | 0.049*  |
| CV%†                | 20.84     | (0.82)  | 19.37     | (3.45)  | 0.339   |
| <b>Pause time</b>   | 17.68     | (5.02)  | 12.61     | (8.33)  | 0.155   |
| CV%†                | 151.46    | (46.67) | 88.17     | (52.72) | 0.143   |
| Burst duration      | 3.36      | (0.16)  | 8.01      | (6.09)  | 0.131   |
| CV%†                | 60.45     | (28.35) | 70.17     | (27.64) | 0.750   |
| Cycles/burst        | 7.28      | (0.55)  | 13.29     | (8.03)  | 0.223   |
| CV%†                | 46.43     | (29.45) | 61.05     | (26.25) | 0.458   |
| Frequency           | 2.44      | (0.27)  | 1.98      | (0.36)  | 0.089   |
| CV%†                | 24.43     | (10.11) | 18.43     | (10.05) | 0.377   |

**Supplementary Material 9:** Non-nutritive sucking characteristics in infants born to mothers with and without epilepsy.

P-values were calculated using the Mann–Whitney U test; \* $p < 0.05$ .

†CV%=(SD/mean×100).

Abbreviations: SD, standard deviation; CV, coefficient of variation.

|                                | n=64                      |                        |                 |
|--------------------------------|---------------------------|------------------------|-----------------|
|                                | <b>Without OXT (n=35)</b> | <b>With OXT (n=29)</b> | <i>p</i> -value |
| Infant's arousal level         |                           |                        | 0.251           |
| Asleep                         | 23 (65.7)                 | 19 (65.5)              |                 |
| Quietly awake                  | 3 (8.6)                   | 6 (20.7)               |                 |
| Crying                         | 9 (25.7)                  | 4 (13.8)               |                 |
| Time required to start sucking |                           |                        | 0.586           |
| Within 1 minute                | 21 (60.0)                 | 15 (51.7)              |                 |
| Within 1–3 minutes             | 4 (11.4)                  | 6 (20.7)               |                 |
| After 3 minutes                | 10 (28.6)                 | 8 (27.6)               |                 |

**Supplementary Material 10:** Information on infants at the time of NNS measurements

The data shown are mean±SD or number of people (%).

The *p*-values were estimated from the chi-squared test.

Abbreviations: OXT, oxytocin.

|                                                       |                                                                | Without Oxytocin<br>n=35 |                 | With Oxytocin<br>n=29 |                 | n=64<br>p-value |
|-------------------------------------------------------|----------------------------------------------------------------|--------------------------|-----------------|-----------------------|-----------------|-----------------|
| Details of feeding methods                            |                                                                | Mean                     | SD              | Mean                  | SD              |                 |
| 72 hours<br>postpartum<br>(during<br>hospitalization) | Total number of supplemental<br>formula use from birth (times) | 12.97                    | (6.37)          | 15.59                 | (6.54)          | 0.101           |
|                                                       | Total amount of supplemental<br>formula from birth (ml)        | 216.14                   | (131.81)        | 247.59                | (116.62)        | 0.068           |
|                                                       | Total number of breastfeeding<br>from birth (times)            | 22.00                    | (5.35)          | 20.41                 | (5.97)          | 0.417           |
| 1 month<br>postpartum                                 | Number of supplemental formula<br>use/ day(times)              | <b>2.51</b>              | <b>(2.99)</b>   | <b>4.45</b>           | <b>(2.98)</b>   | <b>0.018*</b>   |
|                                                       | Amount of supplemental formula<br>/day (ml)                    | <b>207.71</b>            | <b>(267.14)</b> | <b>335.34</b>         | <b>(268.16)</b> | <b>0.031*</b>   |
|                                                       | Number of breastfeeding/day<br>(times)                         | 8.18                     | (3.05)          | 7.52                  | (3.03)          | 0.375           |

**Supplementary Material 11:** Details of feeding methods during hospitalization and one month postpartum.  
The *p*-values were estimated from the Mann-Whitney U test; \**p*<0.05.  
Abbreviations: SD, standard deviation.

|                                                                         | $\beta$ | SE   | <i>p</i> -value |
|-------------------------------------------------------------------------|---------|------|-----------------|
| OXT → Total bursts                                                      | -0.29   | 1.52 | 0.017*          |
| OXT → Pause time                                                        | 0.24    | 2.02 | 0.05*           |
| OXT → Exclusive breastfeeding/Other                                     | -0.24   | 0.11 | 0.047*          |
| Total bursts → Exclusive breastfeeding/Other                            | -0.04   | 0.01 | 0.734           |
| Pause time → Exclusive breastfeeding/Other                              | 0.18    | 0.01 | 0.127           |
| Breastfeeding intentions → Exclusive breastfeeding/Other                | 0.35    | 0.09 | 0.001**         |
| Duration of labor → Exclusive breastfeeding/Other                       | -0.09   | 0.00 | 0.413           |
| History of childbirth → Exclusive breastfeeding/Other                   | 0.07    | 0.10 | 0.554           |
| Maternal age → Exclusive breastfeeding/Other                            | 0.01    | 0.01 | 0.924           |
| Nipple shape problems for breastfeeding → Exclusive breastfeeding/Other | 0.04    | 0.14 | 0.742           |

**Supplementary Material 12:** Estimated direct effects in the path diagram.

\* $p < 0.05$  \*\* $p < 0.01$  \*\*\* $p < 0.001$

Abbreviations:  $\beta$ , standardized partial regression coefficient; SE, standard error; OXT, oxytocin.

Exclusive breastfeeding:1/Other:0

| Predictor Variables                     | Exclusive breastfeeding:1/Other:0 |        |                |                  |
|-----------------------------------------|-----------------------------------|--------|----------------|------------------|
|                                         | B                                 | Exp(B) | p-value        | 95% CI           |
| <b>Oxytocin exposure</b>                | -1.281                            | 0.278  | <b>0.032*</b>  | [0.086–0.898]    |
| <b>Maternal factor</b>                  |                                   |        |                |                  |
| Age                                     | -0.056                            | 0.946  | 0.303          | [0.851–1.051]    |
| Smoking history                         | 0.427                             | 1.533  | 0.547          | [0.382–6.155]    |
| EPDS score at discharge                 | -0.861                            | 1.020  | 0.789          | [0.885–1.175]    |
| History of childbirth                   | -1.145                            | 1.857  | 0.267          | [0.623–5.537]    |
| Maternal complications                  |                                   |        |                |                  |
| Hypertensive disorders of pregnancy     | -20.485                           | 0.000  | 0.999          | –                |
| Gestational or maternal diabetes        | -0.163                            | 0.850  | 0.807          | [0.231–3.128]    |
| Epilepsy                                | 0.817                             | 2.263  | 0.571          | [0.134–38.117]   |
| Cardiac disease                         | -0.642                            | 0.526  | 0.577          | [0.055–5.035]    |
| Kidney disease                          | 0.100                             | 1.105  | 0.936          | [0.094–12.948]   |
| Thyroid disease                         | -0.329                            | 0.719  | 0.781          | [0.070–7.375]    |
| Threatened preterm labor                | 0.100                             | 1.105  | 0.936          | [0.094–12.948]   |
| Other complications                     | 0.279                             | 1.321  | 0.688          | [0.339–5.155]    |
| No complications                        | 0.953                             | 2.593  | 0.206          | [0.816–8.239]    |
| <b>Breastfeeding factor</b>             |                                   |        |                |                  |
| Breastfeeding intentions                | 1.909                             | 6.748  | <b>0.003**</b> | [1.917–23.757]   |
| Nipple shape problems for breastfeeding | -0.839                            | 0.432  | 0.314          | [0.084–2.215]    |
| Breast and nipple troubles at discharge | 0.668                             | 1.951  | 0.231          | [0.654–5.823]    |
| <b>Delivery factor</b>                  |                                   |        |                |                  |
| Duration of labor                       | -0.002                            | 0.998  | 0.169          | [0.996–1.001]    |
| Blood loss at delivery                  | 0.000                             | 1.000  | 0.926          | [0.998–1.002]    |
| Instrumental delivery                   | -1.279                            | 0.278  | 0.247          | [0.032–2.429]    |
| Use of epidural analgesia in labor      | -0.329                            | 0.719  | 0.781          | [0.070–7.375]    |
| <b>Infant factor</b>                    |                                   |        |                |                  |
| Birth weight                            | 0.000                             | 1.000  | 0.875          | [0.999–1.002]    |
| Umbilical cord arterial blood pH value  | 1.473                             | 4.361  | 0.794          | [0.000–2785.738] |
| Gestational age at birth                | -0.006                            | 0.994  | 0.871          | [0.919–1.074]    |
| Infant gender                           | -0.568                            | 0.566  | 0.296          | [0.195–1.645]    |

**Supplementary Material 13:** Factors influencing the feeding method at 1 month postpartum

The *p*-values were estimated using simple linear regression analysis; \**p*<0.05, \*\**p*<0.01, \*\*\**p*<0.001

Abbreviations: CI, confidence interval; EPDS, Edinburgh postnatal depression scale.
